# Supplementary figures and images for: Immunogenomics Analysis Reveals that TP53 Mutations Inhibit Tumor Immunity in Gastric Cancer
Source: PubMed Central journal article supplement — Transl Oncol. 2018 Jul 27;11(5):1171–87. doi: 10.1016/j.tranon.2018.07.012 (PMC6078052; doi:10.1016/j.tranon.2018.07.012), 2018-07-27

Figure S1

A

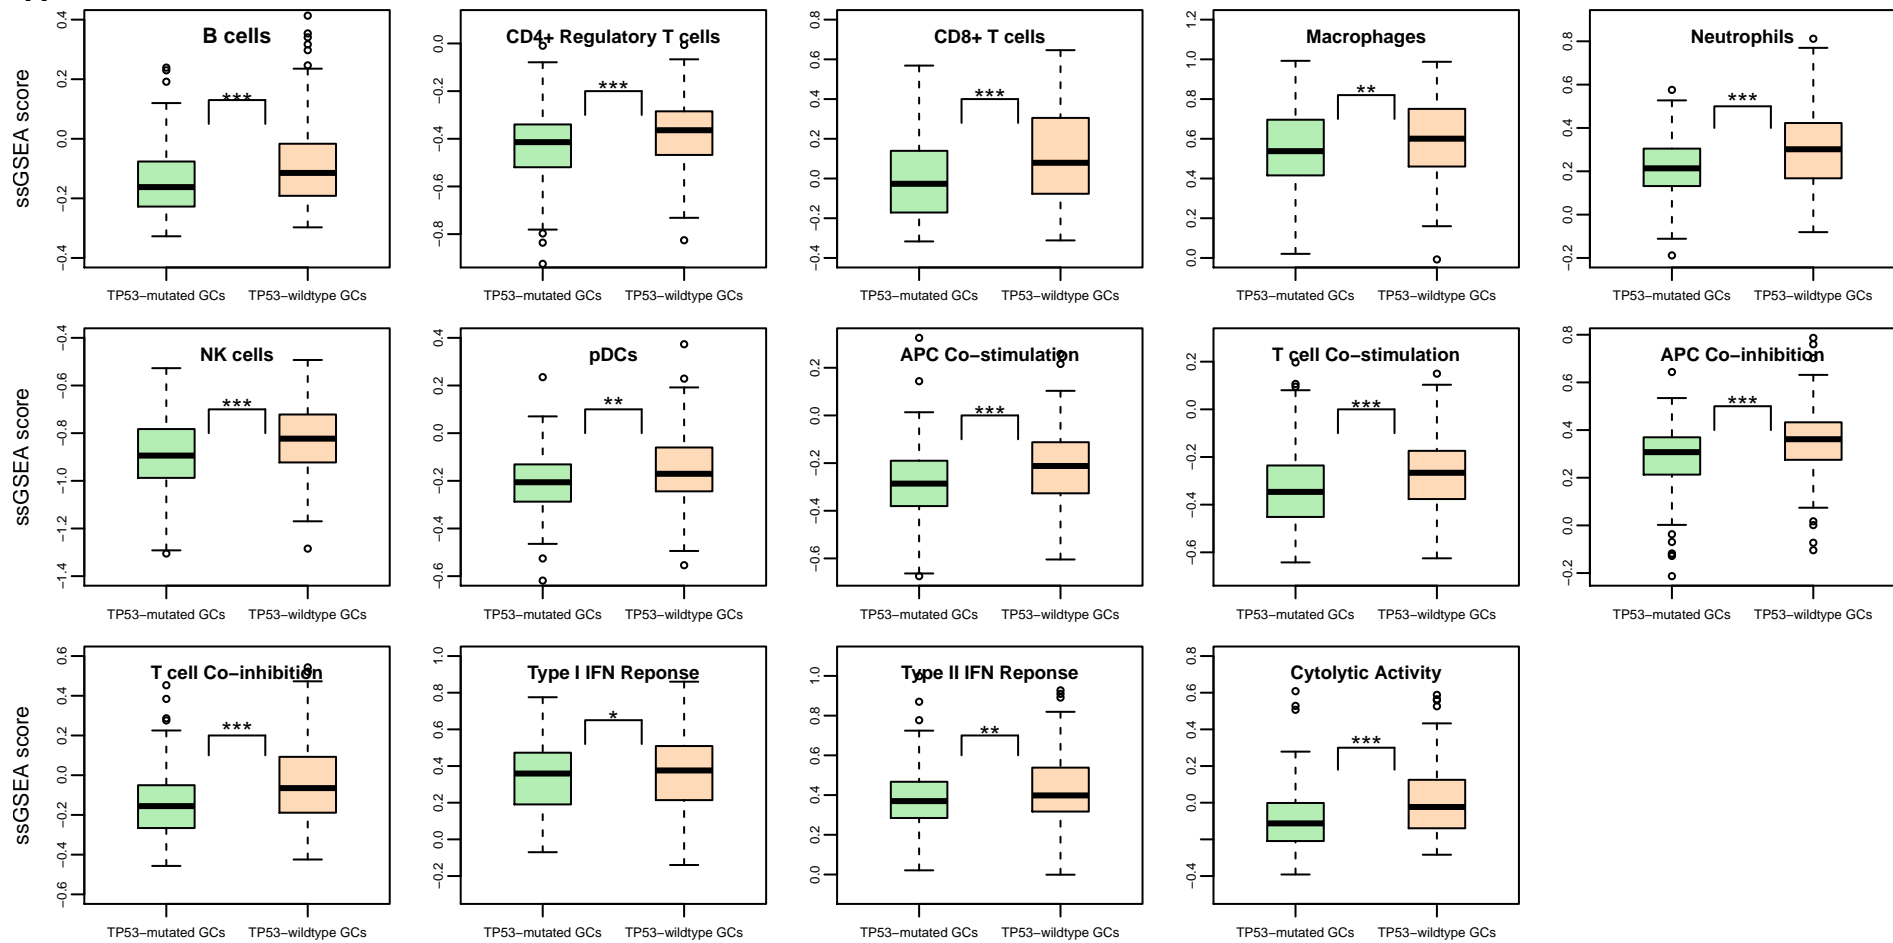

Immune cell type and function genes (TCGA)

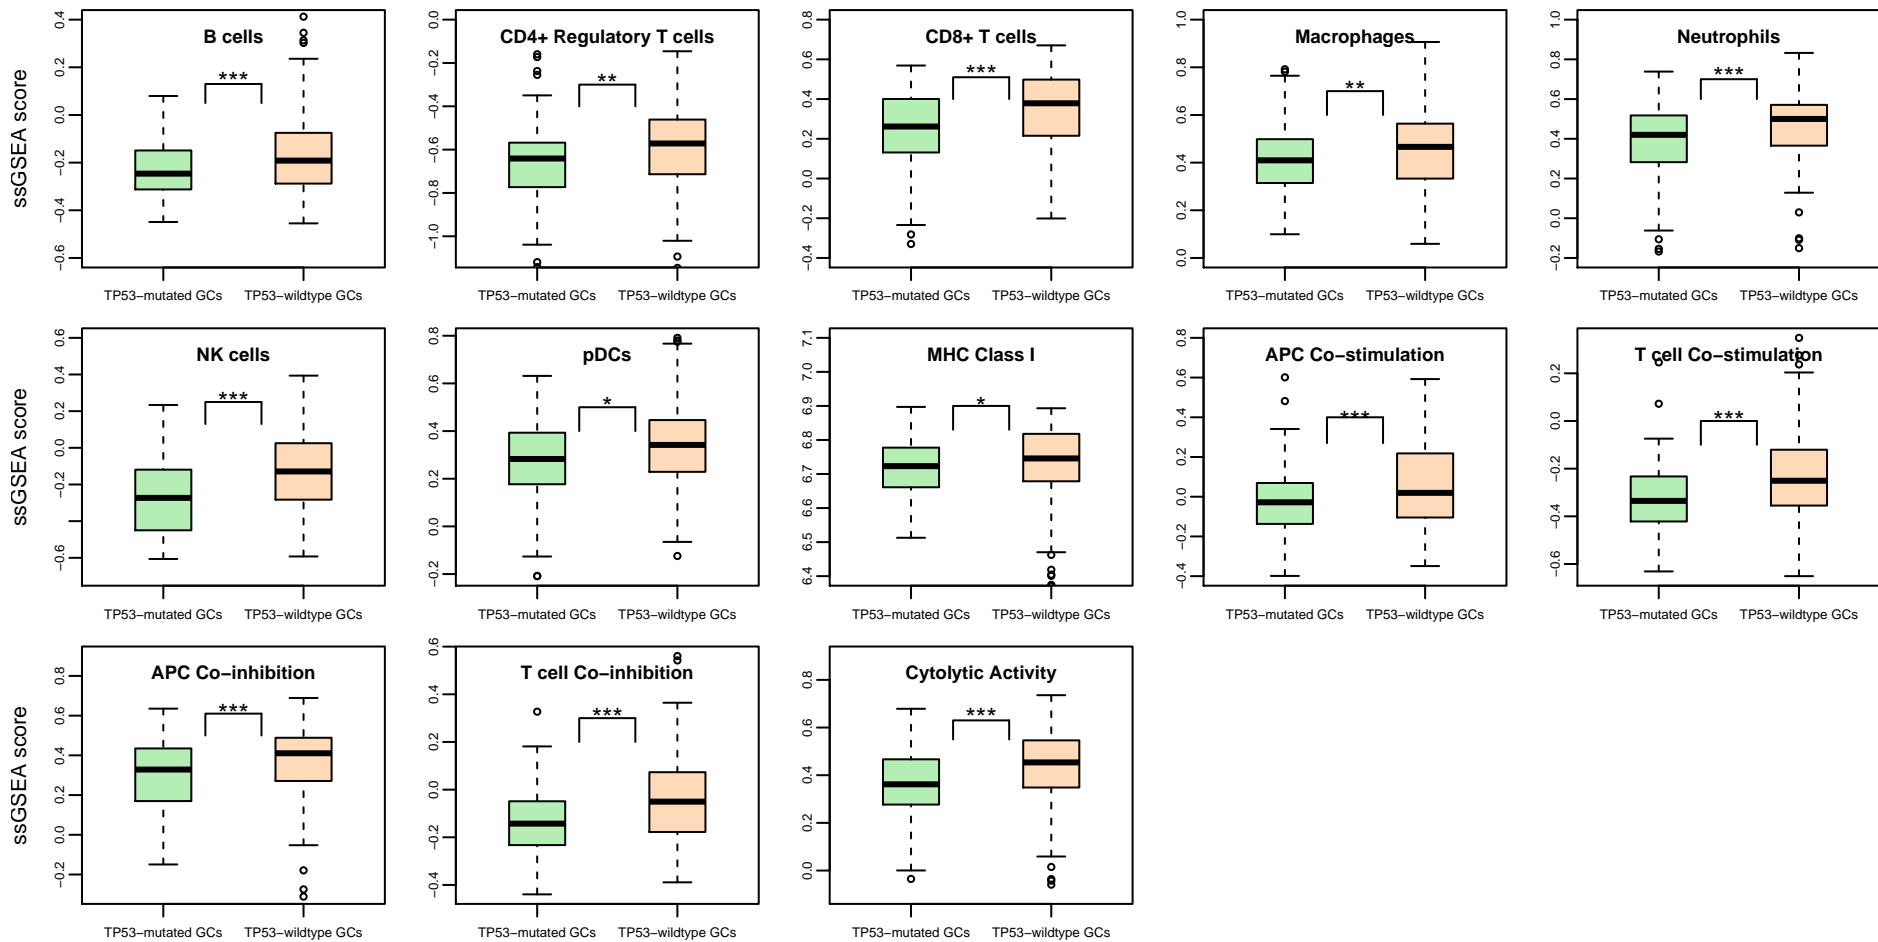

Immune cell type and function genes (ACRG)

**B**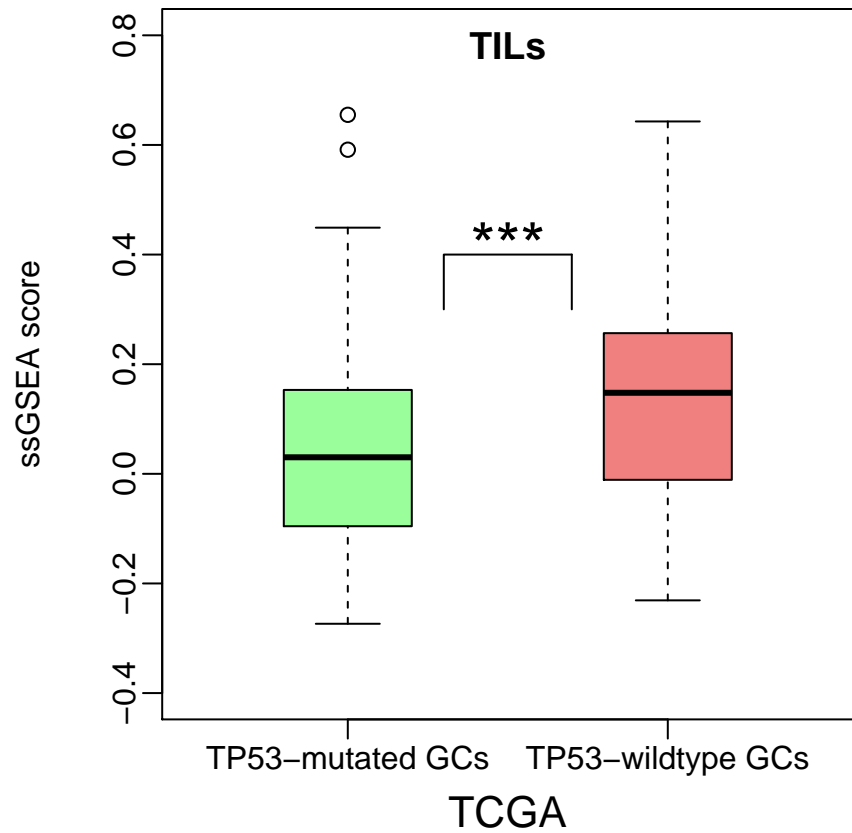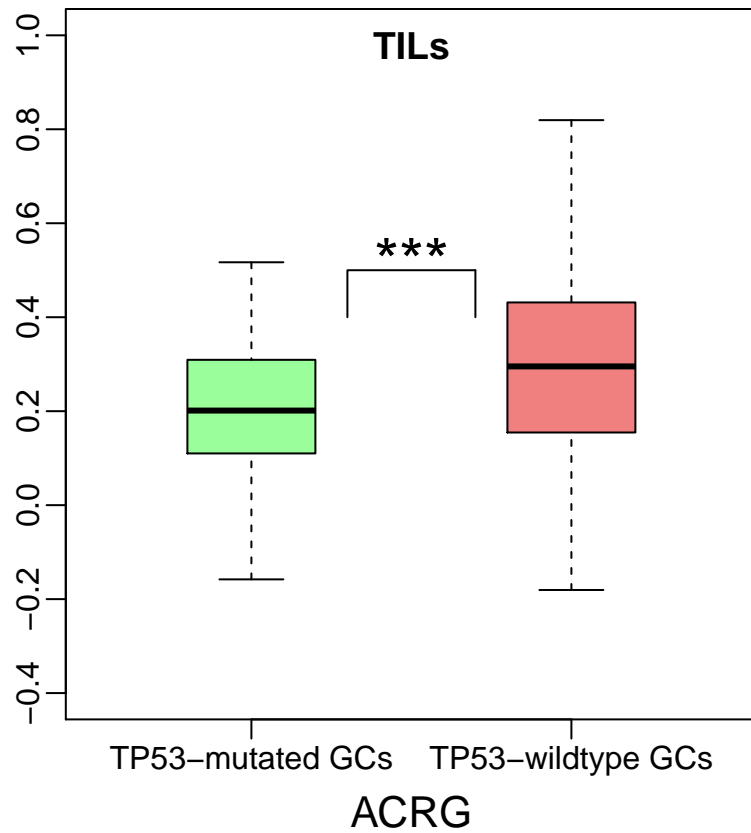

C

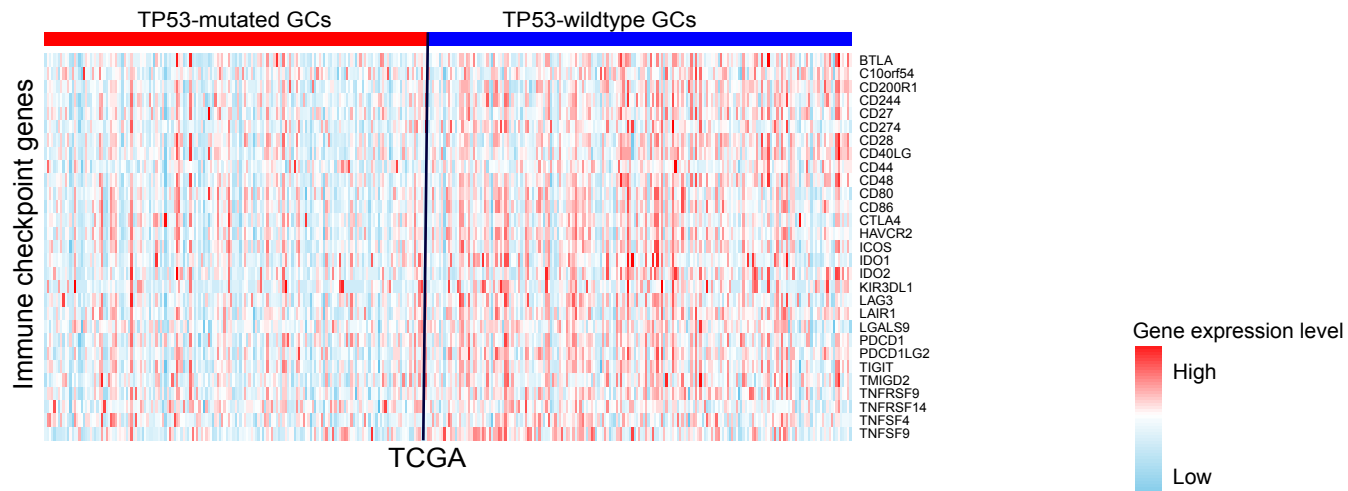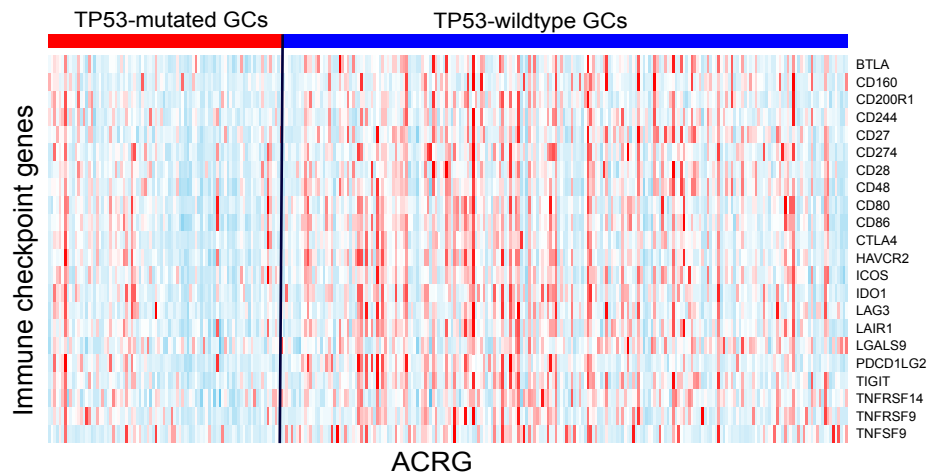

**D**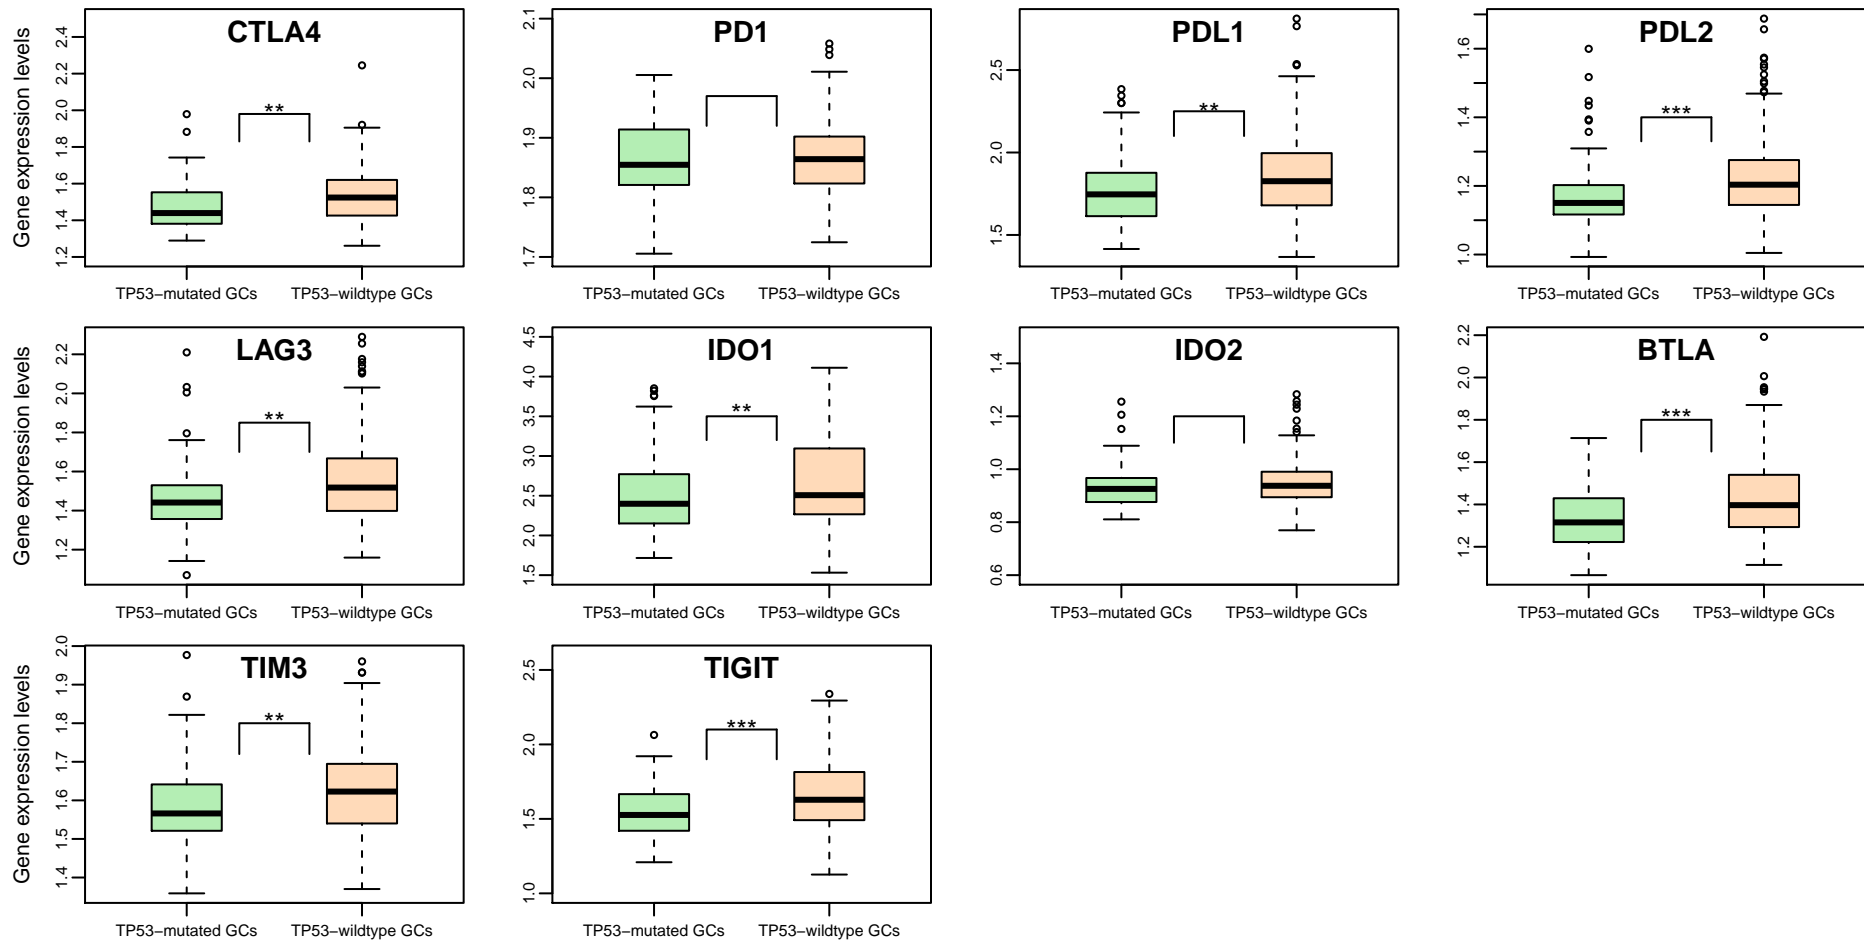

Supplement: mmc6.pdf [file mmc6.pdf]

Figure S2

**A**

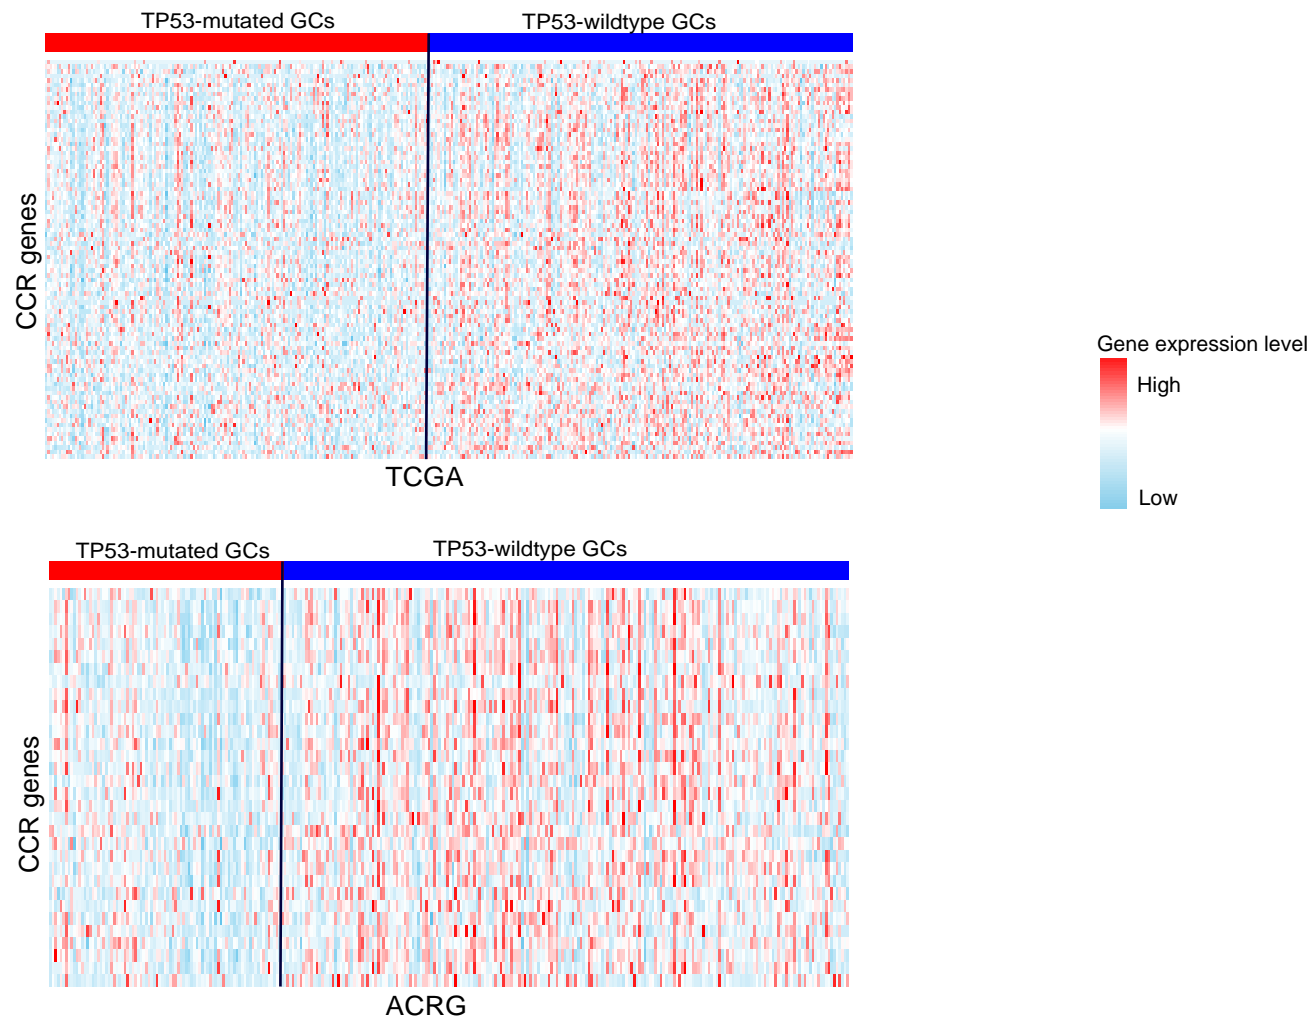

**B**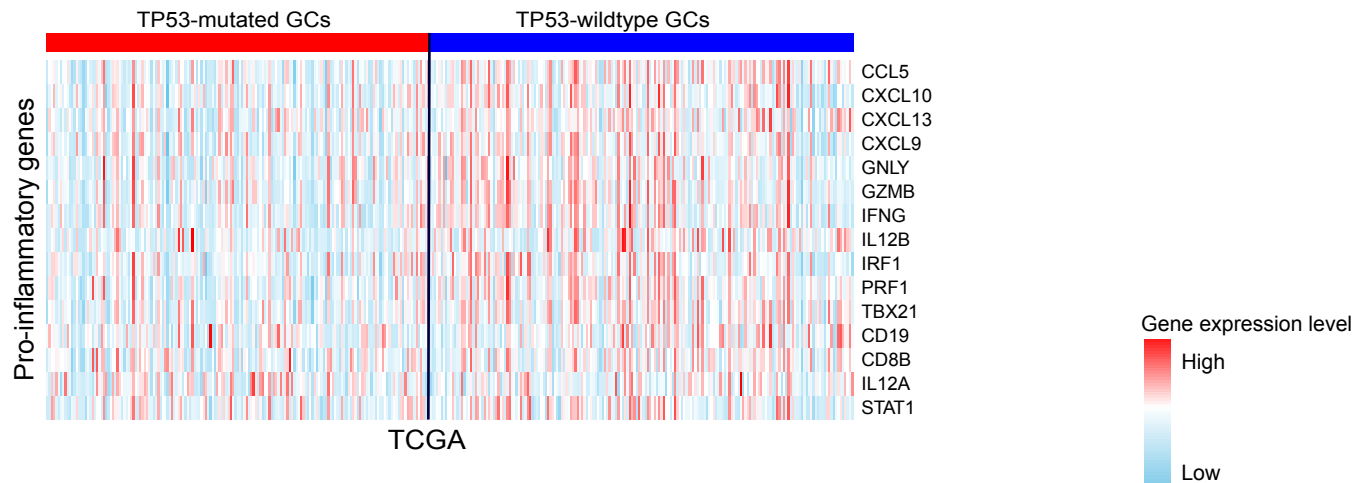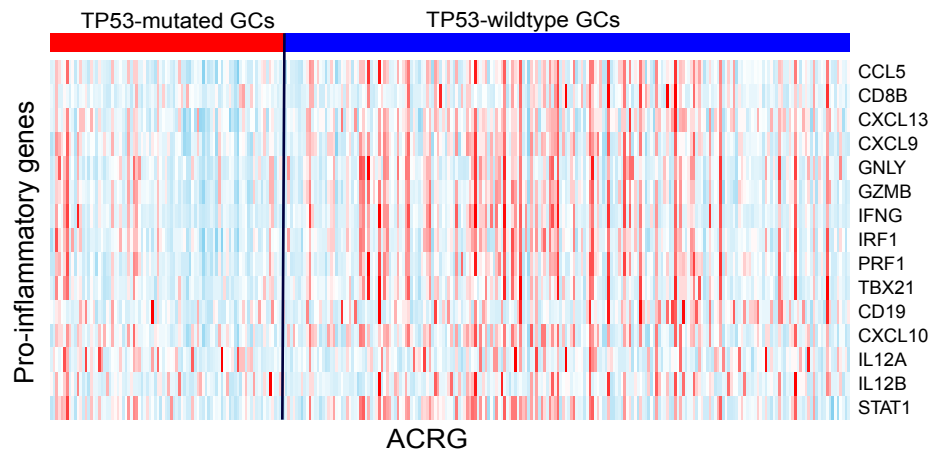

Supplement: mmc7.pdf [file mmc7.pdf]
